# Supplementary material for: Innovative Design of an Experimental Jasmine Flower Automated Picker System Using Vertical Gripper and YOLOv5
Source: MDPI journal article supplement (doi:10.3390/agriculture13081595), 2023-08-12

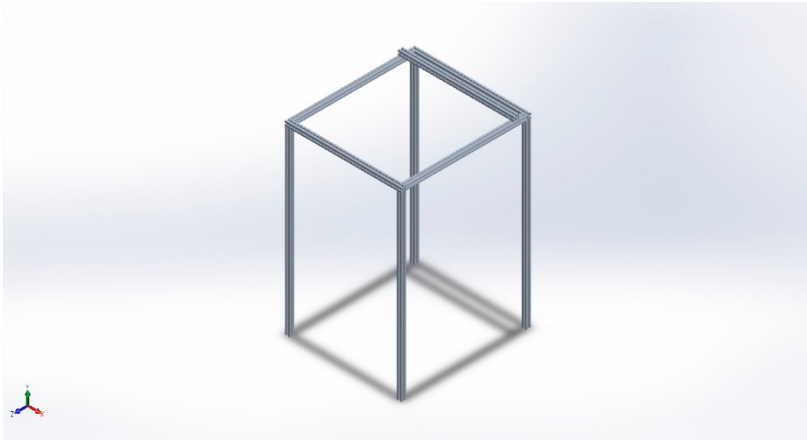

# Simulation of BASIC FRAME

Date

Designer: Solidworks

Study name: Position 11

Analysis type: Static

## Table of Contents

|                          |   |
|--------------------------|---|
| Assumptions .....        | 2 |
| Model Information .....  | 2 |
| Study Properties .....   | 4 |
| Units .....              | 4 |
| Material Properties..... | 5 |
| Loads and Fixtures.....  | 6 |
| Contact Information..... | 6 |
| Mesh information .....   | 7 |
| Resultant Forces .....   | 8 |
| Study Results .....      | 9 |

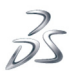

## Assumptions

- Gripper is removed and force equals to its weight is applied instead to simplify the analysis.
- Weight of stepper motors, racks, and other assembly part is moved to the corner (severe position).

## Model Information

| 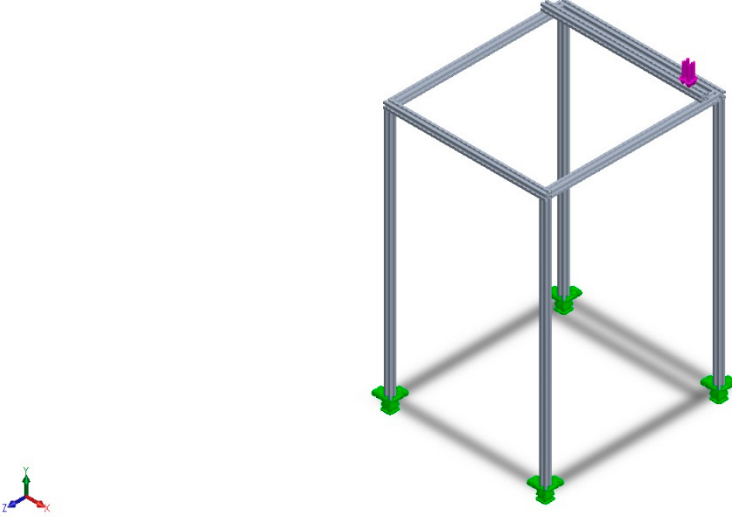 <p>Model name: BASIC FRAME<br/>Current Configuration: Default</p> |            |                                                                                                            |                                                                                                           |
|-----------------------------------------------------------------------------------------------------------------------------------------------------|------------|------------------------------------------------------------------------------------------------------------|-----------------------------------------------------------------------------------------------------------|
| Solid Bodies                                                                                                                                        |            |                                                                                                            |                                                                                                           |
| Document Name and Reference                                                                                                                         | Treated As | Volumetric Properties                                                                                      | Document Path/Date Modified                                                                               |
| Boss-Extrude1<br>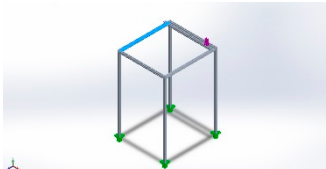                                                | Solid Body | Mass:1.32741 kg<br>Volume:0.000491632 m <sup>3</sup><br>Density:2700 kg/m <sup>3</sup><br>Weight:13.0086 N | C:\Users\Zeina\OneDrive\Desktop\Maryam\Fram\F<br>rame\C1_GA4040_1000.sldprt<br>Mar 10 22:10:53 2023       |
| Boss-Extrude1<br>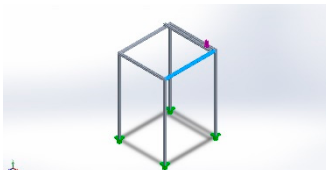                                                | Solid Body | Mass:1.32741 kg<br>Volume:0.000491632 m <sup>3</sup><br>Density:2700 kg/m <sup>3</sup><br>Weight:13.0086 N | C:\Users\Zeina\OneDrive\Desktop\Maryam\Fram\F<br>rame\C1_GA4040_1000.sldprt<br>Mar 10 22:10:53 2023       |
| Boss-Extrude1<br>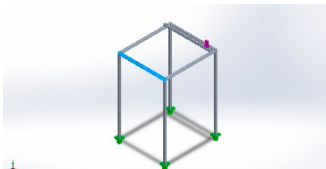                                                | Solid Body | Mass:1.28758 kg<br>Volume:0.000476883 m <sup>3</sup><br>Density:2700 kg/m <sup>3</sup><br>Weight:12.6183 N | C:\Users\Zeina\OneDrive\Desktop\Maryam\Fram\F<br>rame\GA4040_TSection_1500.sldprt<br>Mar 10 22:11:44 2023 |

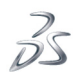

|                                                                                                           |            |                                                                                                                                      |                                                                                                            |
|-----------------------------------------------------------------------------------------------------------|------------|--------------------------------------------------------------------------------------------------------------------------------------|------------------------------------------------------------------------------------------------------------|
| <b>Boss-Extrude1</b><br>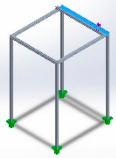 | Solid Body | <b>Mass:1.28758 kg</b><br><b>Volume:0.000476883 m<sup>3</sup></b><br><b>Density:2700 kg/m<sup>3</sup></b><br><b>Weight:12.6183 N</b> | C:\Users\Zeina\OneDrive\Desktop\Maryam\F<br>rame\GA4040_TSection_1<br>500.sldprt<br>Mar 10 22:11:44 2023   |
| <b>Fillet3</b><br>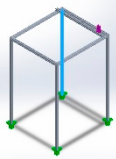       | Solid Body | <b>Mass:1.99063 kg</b><br><b>Volume:0.000737269 m<sup>3</sup></b><br><b>Density:2700 kg/m<sup>3</sup></b><br><b>Weight:19.5081 N</b> | C:\Users\Zeina\OneDrive\Desktop\Maryam\F<br>rame\GA4040_TSection_1<br>500_1.sldprt<br>Mar 10 22:13:19 2023 |
| <b>Fillet3</b><br>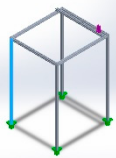       | Solid Body | <b>Mass:1.99063 kg</b><br><b>Volume:0.000737269 m<sup>3</sup></b><br><b>Density:2700 kg/m<sup>3</sup></b><br><b>Weight:19.5081 N</b> | C:\Users\Zeina\OneDrive\Desktop\Maryam\F<br>rame\GA4040_TSection_1<br>500_1.sldprt<br>Mar 10 22:13:19 2023 |
| <b>Fillet3</b><br>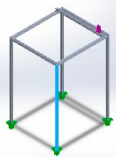       | Solid Body | <b>Mass:1.99063 kg</b><br><b>Volume:0.000737269 m<sup>3</sup></b><br><b>Density:2700 kg/m<sup>3</sup></b><br><b>Weight:19.5081 N</b> | C:\Users\Zeina\OneDrive\Desktop\Maryam\F<br>rame\GA4040_TSection_1<br>500_1.sldprt<br>Mar 10 22:13:19 2023 |
| <b>Fillet3</b><br>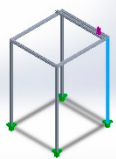      | Solid Body | <b>Mass:1.99063 kg</b><br><b>Volume:0.000737269 m<sup>3</sup></b><br><b>Density:2700 kg/m<sup>3</sup></b><br><b>Weight:19.5081 N</b> | C:\Users\Zeina\OneDrive\Desktop\Maryam\F<br>rame\GA4040_TSection_1<br>500_1.sldprt<br>Mar 10 22:13:19 2023 |
| <b>Split Line5</b><br>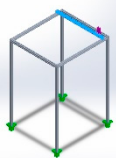 | Solid Body | <b>Mass:1.2836 kg</b><br><b>Volume:0.000475408 m<sup>3</sup></b><br><b>Density:2700 kg/m<sup>3</sup></b><br><b>Weight:12.5793 N</b>  | C:\Users\Zeina\OneDrive\Desktop\Maryam\F<br>rame\Loaded bar<br>(Left&Right).SLDPRT<br>Mar 10 21:55:26 2023 |

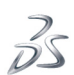

## Study Properties

|                                                                |                                                                           |
|----------------------------------------------------------------|---------------------------------------------------------------------------|
| Study name                                                     | Position 11                                                               |
| Analysis type                                                  | Static                                                                    |
| Mesh type                                                      | Solid Mesh                                                                |
| Thermal Effect:                                                | On                                                                        |
| Thermal option                                                 | Include temperature loads                                                 |
| Zero strain temperature                                        | 298 Kelvin                                                                |
| Include fluid pressure effects from SOLIDWORKS Flow Simulation | Off                                                                       |
| Solver type                                                    | FFEPlus                                                                   |
| Inplane Effect:                                                | Off                                                                       |
| Soft Spring:                                                   | Off                                                                       |
| Inertial Relief:                                               | Off                                                                       |
| Incompatible bonding options                                   | Automatic                                                                 |
| Large displacement                                             | Off                                                                       |
| Compute free body forces                                       | On                                                                        |
| Friction                                                       | Off                                                                       |
| Use Adaptive Method:                                           | Off                                                                       |
| Result folder                                                  | SOLIDWORKS document<br>(C:\Users\Zeina\OneDrive\Desktop\Maryam\Fram\Fram) |

## Units

|                     |                  |
|---------------------|------------------|
| Unit system:        | SI (MKS)         |
| Length/Displacement | mm               |
| Temperature         | Kelvin           |
| Angular velocity    | Rad/sec          |
| Pressure/Stress     | N/m <sup>2</sup> |

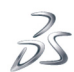

## Material Properties

| Model Reference                                                                   | Properties                                                                                                                                                                                                                                                                                                                                                                                                                                                                                     | Components                                                                                                                                                                                                                                                                                                                                                                                                                                                                      |
|-----------------------------------------------------------------------------------|------------------------------------------------------------------------------------------------------------------------------------------------------------------------------------------------------------------------------------------------------------------------------------------------------------------------------------------------------------------------------------------------------------------------------------------------------------------------------------------------|---------------------------------------------------------------------------------------------------------------------------------------------------------------------------------------------------------------------------------------------------------------------------------------------------------------------------------------------------------------------------------------------------------------------------------------------------------------------------------|
| 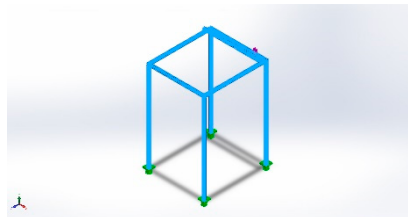 | <b>Name:</b> 6061 Alloy<br><b>Model type:</b> Linear Elastic Isotropic<br><b>Default failure criterion:</b> Max von Mises Stress<br><b>Yield strength:</b> 5.51485e+07 N/m <sup>2</sup><br><b>Tensile strength:</b> 1.24084e+08 N/m <sup>2</sup><br><b>Elastic modulus:</b> 6.9e+10 N/m <sup>2</sup><br><b>Poisson's ratio:</b> 0.33<br><b>Mass density:</b> 2700 kg/m <sup>3</sup><br><b>Shear modulus:</b> 2.6e+10 N/m <sup>2</sup><br><b>Thermal expansion coefficient:</b> 2.4e-05 /Kelvin | SolidBody 1(Boss-Extrude1)(C1_GA4040_1000-1),<br>SolidBody 1(Boss-Extrude1)(C1_GA4040_1000-2),<br>SolidBody 1(Boss-Extrude1)(GA4040_TSection_1500-1),<br>SolidBody 1(Boss-Extrude1)(GA4040_TSection_1500-2),<br>SolidBody 1(Fillet3)(GA4040_TSection_1500_1-1),<br>SolidBody 1(Fillet3)(GA4040_TSection_1500_1-2),<br>SolidBody 1(Fillet3)(GA4040_TSection_1500_1-3),<br>SolidBody 1(Fillet3)(GA4040_TSection_1500_1-4),<br>SolidBody 1(Split Line5)(Loaded bar (Left&Right)-2) |
| Curve Data:N/A                                                                    |                                                                                                                                                                                                                                                                                                                                                                                                                                                                                                |                                                                                                                                                                                                                                                                                                                                                                                                                                                                                 |

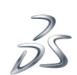

## Loads and Fixtures

| Fixture name            | Fixture Image                                                                     | Fixture Details                                           |            |           |
|-------------------------|-----------------------------------------------------------------------------------|-----------------------------------------------------------|------------|-----------|
| Fixed-2                 | 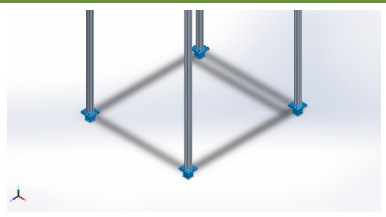 | <b>Entities:</b> 4 face(s)<br><b>Type:</b> Fixed Geometry |            |           |
| <b>Resultant Forces</b> |                                                                                   |                                                           |            |           |
| Components              | X                                                                                 | Y                                                         | Z          | Resultant |
| Reaction force(N)       | -0.0134554                                                                        | 117.19                                                    | 0.00853139 | 117.19    |
| Reaction Moment(N.m)    | 0                                                                                 | 0                                                         | 0          | 0         |

| Load name | Load Image                                                                         | Load Details                                                                           |
|-----------|------------------------------------------------------------------------------------|----------------------------------------------------------------------------------------|
| Force-1   | 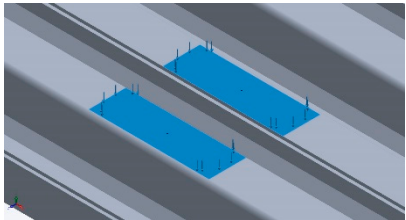 | <b>Entities:</b> 2 face(s)<br><b>Type:</b> Apply normal force<br><b>Value:</b> 117.2 N |

## Contact Information

| Contact        | Contact Image                                                                       | Contact Properties                                                                          |
|----------------|-------------------------------------------------------------------------------------|---------------------------------------------------------------------------------------------|
| Global Contact | 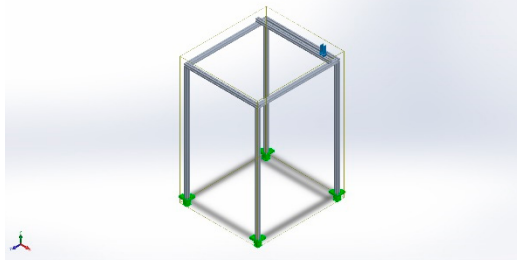 | <b>Type:</b> Bonded<br><b>Components:</b> 1 component(s)<br><b>Options:</b> Compatible mesh |

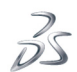

## Mesh information

|                                            |                      |
|--------------------------------------------|----------------------|
| Mesh type                                  | Solid Mesh           |
| Mesher Used:                               | Curvature-based mesh |
| Jacobian points                            | 4 Points             |
| Maximum element size                       | 56.8252 mm           |
| Minimum element size                       | 11.365 mm            |
| Mesh Quality Plot                          | High                 |
| Remesh failed parts with incompatible mesh | Off                  |

## Mesh information - Details

|                                      |          |
|--------------------------------------|----------|
| Total Nodes                          | 1306647  |
| Total Elements                       | 727423   |
| Maximum Aspect Ratio                 | 286.64   |
| % of elements with Aspect Ratio < 3  | 2.34     |
| % of elements with Aspect Ratio > 10 | 54       |
| % of distorted elements(Jacobian)    | 0        |
| Time to complete mesh(hh:mm:ss):     | 00:01:46 |
| Computer name:                       |          |

Model name: BASIC FRAME  
Study name: Position 11(-Default-)  
Mesh type: Solid Mesh

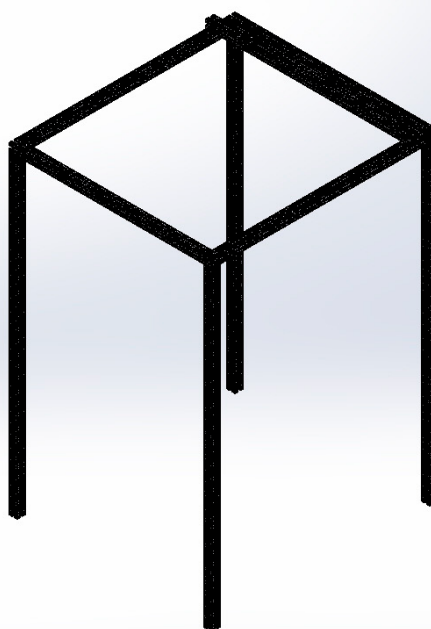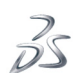

## Resultant Forces

### Reaction forces

| Selection set | Units | Sum X      | Sum Y  | Sum Z      | Resultant |
|---------------|-------|------------|--------|------------|-----------|
| Entire Model  | N     | -0.0134554 | 117.19 | 0.00853139 | 117.19    |

### Reaction Moments

| Selection set | Units | Sum X | Sum Y | Sum Z | Resultant |
|---------------|-------|-------|-------|-------|-----------|
| Entire Model  | N.m   | 0     | 0     | 0     | 0         |

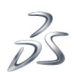

## Study Results

| Name    | Type                  | Min                                          | Max                                           |
|---------|-----------------------|----------------------------------------------|-----------------------------------------------|
| Stress1 | VON: von Mises Stress | 0.00 N/mm <sup>2</sup> (MPa)<br>Node: 644374 | 12.97 N/mm <sup>2</sup> (MPa)<br>Node: 319533 |

Model name: BASIC FRAME  
Study name: Position 11(-Default-)  
Plot type: Static nodal stress Stress1  
Deformation scale: 1610.02

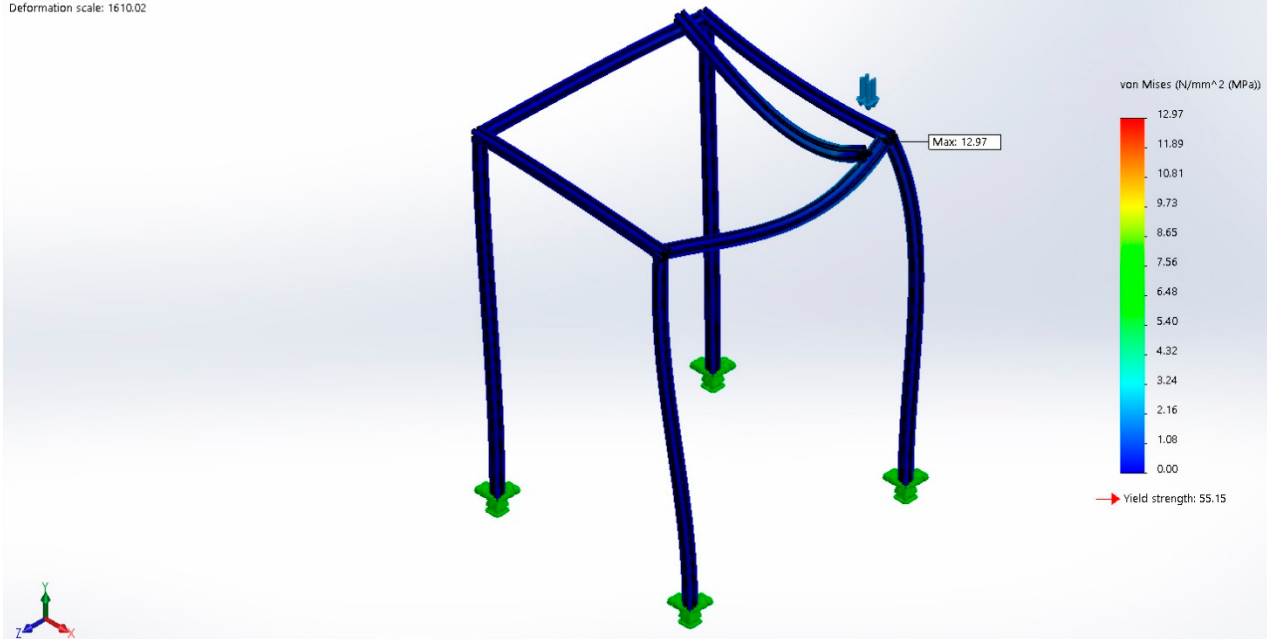

BASIC FRAME-Position 11-Stress-Stress1

| Name          | Type                         | Min                      | Max                       |
|---------------|------------------------------|--------------------------|---------------------------|
| Displacement1 | URES: Resultant Displacement | 0.000 mm<br>Node: 404413 | 0.127 mm<br>Node: 1238866 |

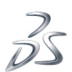

Model name: BASIC FRAME  
 Study name: Position 11(-Default-)  
 Plot type: Static displacement Displacement1  
 Deformation scale: 1610.02

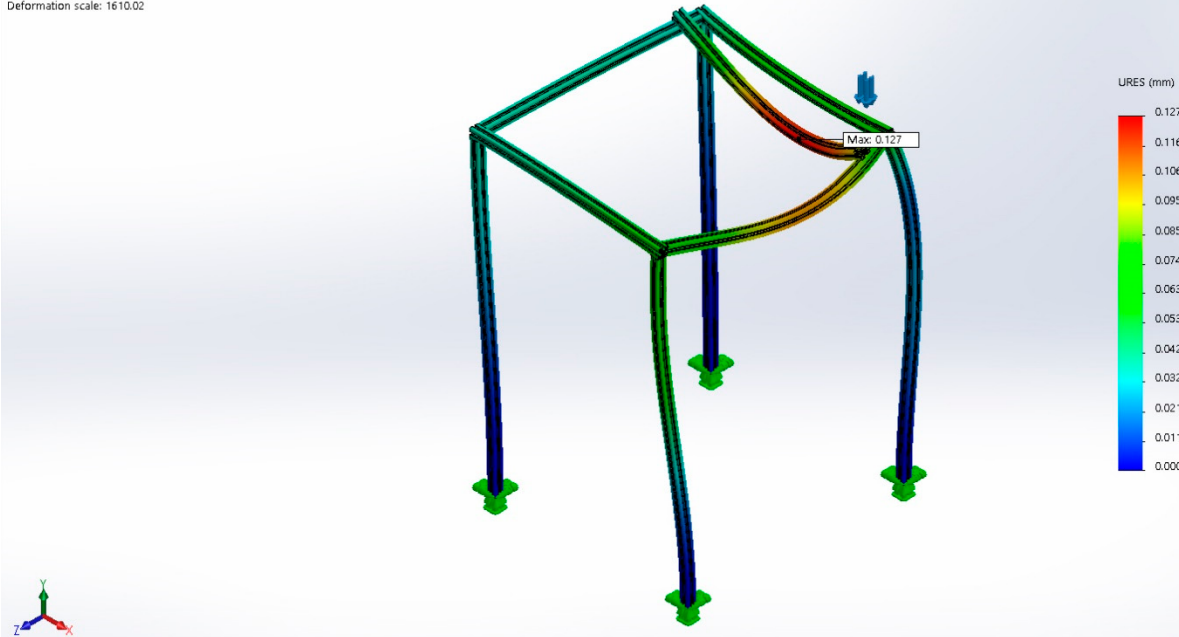

BASIC FRAME-Position 11-Displacement-Displacement1

| Name    | Type                     | Min                          | Max                          |
|---------|--------------------------|------------------------------|------------------------------|
| Strain1 | ESTRN: Equivalent Strain | 1.332e-09<br>Element: 376861 | 9.483e-05<br>Element: 174269 |

Model name: BASIC FRAME  
 Study name: Position 11(-Default-)  
 Plot type: Static strain Strain1  
 Deformation scale: 1610.02

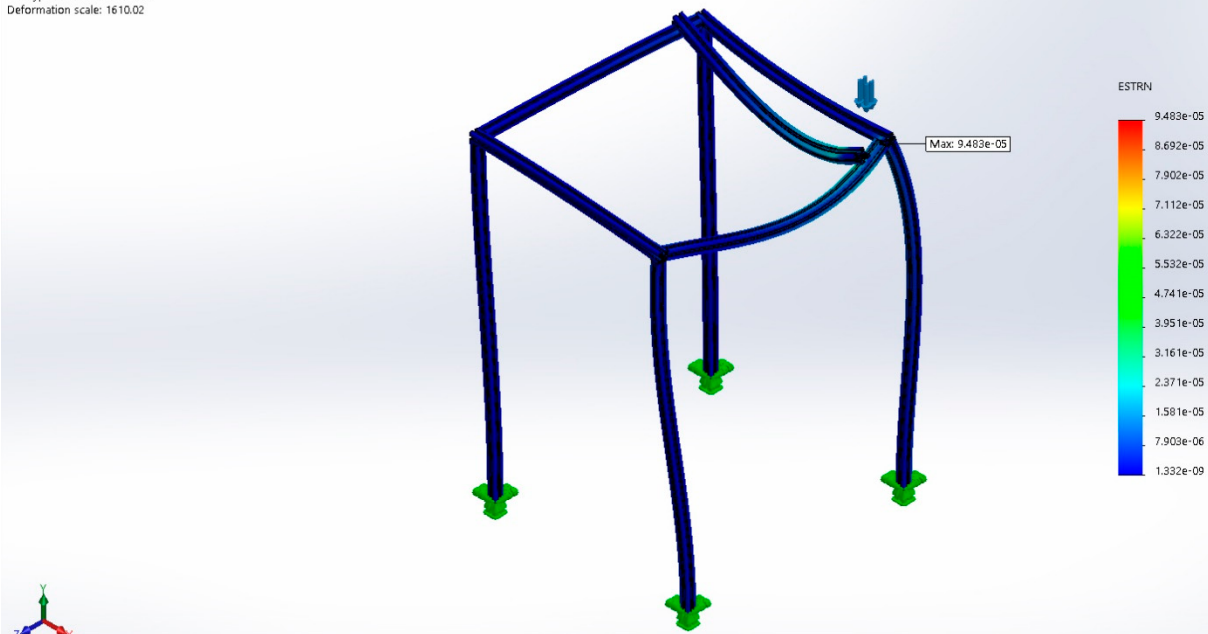

BASIC FRAME-Position 11-Strain-Strain1

| Name              | Type      | Min                     | Max                    |
|-------------------|-----------|-------------------------|------------------------|
| Factor of Safety1 | Automatic | 6.79933<br>Node: 319533 | 622879<br>Node: 644374 |



Model name: BASIC FRAME  
Study name: Position 11(-Default-)  
Plot type: Factor of Safety Factor of Safety1  
Criterion : Automatic  
Factor of safety distribution: Min FOS = 6.8

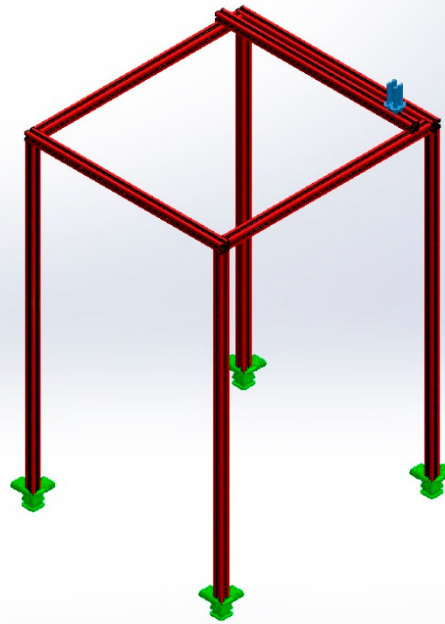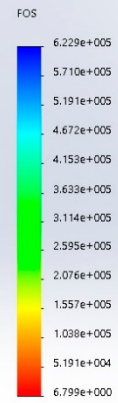

BASIC FRAME-Position 11-Factor of Safety-Factor of Safety1



Supplement: s1 [file s1 › Supplementary B.pdf]
