# Supplementary material for: Innovative Design of an Experimental Jasmine Flower Automated Picker System Using Vertical Gripper and YOLOv5
Source: MDPI journal article supplement (doi:10.3390/agriculture13081595), 2023-08-12
Supplement: s1 [file s1]

Archive with 2 entries (2 files):
- Supplementary A.pdf
- Supplementary B.pdf
